# Supplementary material for: The Exon Junction Complex Core Represses Cancer-Specific Mature mRNA Re-splicing: A Potential Key Role in Terminating Splicing
Source: MDPI journal article supplement (doi:10.3390/ijms22126519), 2021-06-17
Supplement: s1 [file s1]

*Communication*

# **The Exon Junction Complex Core Represses Cancer-specific Mature mRNA Re-splicing: A Potential Key Role in Terminating Splicing**

**Yuta Otani<sup>1,2</sup>, Ken-ichi Fujita<sup>1</sup>, Toshiki Kameyama<sup>1,3,\*</sup> and Akila Mayeda<sup>1,\*</sup>**<sup>1</sup> Division of Gene Expression Mechanism, Institute for Comprehensive Medical Science, Fujita Health University, Toyoake, Aichi 470-1192, Japan<sup>2</sup> Laboratories of Discovery Research, Nippon Shinyaku Co., Ltd., Kyoto, Kyoto 601-8550, Japan<sup>3</sup> Present address: Department of Physiology, Fujita Health University, School of Medicine, Toyoake, Aichi 470-1192, Japan

\* Correspondence: tkame@fujita-hu.ac.jp (T.K); mayeda@fujita-hu.ac.jp (A.M.)

## **Contents**

### **Table S3**

(Tables S1 and S2 are uploaded in separate Excel files)

### **Fig. S1**

### **Fig. S2**

### **Fig. S3**

### **Fig. S4**

### **Fig. S5**

**Table S3** List of the synthetic oligonucleotides used in the experiments (see also Table S2).

| siRNAs (sense sequences) for cellular knockdown (T: deoxyribonucleotide)    |                                                            |                                               |
|-----------------------------------------------------------------------------|------------------------------------------------------------|-----------------------------------------------|
| EIF4A3 siRNA #1                                                             | ID: s18876 (Thermo Fisher Scientific)                      | Knockdown (KD) of EIF4A3 (shared in Table S2) |
| EIF4A3 siRNA #2                                                             | ID: s18877 (Thermo Fisher Scientific)                      |                                               |
| RBM8A (Y14) siRNA #1                                                        | ID: s532199 (Thermo Fisher Scientific)                     | KD of RBM8A                                   |
| RBM8A (Y14) siRNA #2                                                        | ID: s532200 (Thermo Fisher Scientific)                     |                                               |
| MAGOH siRNA #1                                                              | ID: s226590 (Thermo Fisher Scientific)                     | KD of MAGOH                                   |
| MAGOH siRNA #2                                                              | ID: s8466 (Thermo Fisher Scientific)                       |                                               |
| CASC3 (MNL51) siRNA #1                                                      | ID: s22392 (Thermo Fisher Scientific)                      | KD of CASC3                                   |
| CASC3 (MNL51) siRNA #2                                                      | ID: s22393 (Thermo Fisher Scientific)                      |                                               |
| UPF1 siRNA #1                                                               | ID: s11927 (Thermo Fisher Scientific)                      | KD of UPF1                                    |
| UPF1 siRNA #2                                                               | ID: s11928 (Thermo Fisher Scientific)                      |                                               |
| NXF1 siRNA #1                                                               | ID: s20533 (Thermo Fisher Scientific)                      | KD of UPF1                                    |
| NXF1 siRNA #2                                                               | ID: s20532 (Thermo Fisher Scientific)                      |                                               |
| ACINUS siRNA                                                                | 5'-gaggccuucuggauugacaTT -3' (Integrated DNA Technologies) | KD of ACINUS                                  |
| PININ siRNA                                                                 | 5'-ggagcaagggcgauuacuaTT-3' (Integrated DNA Technologies)  | KD of PININ                                   |
| RNPS1 siRNA                                                                 | 5'-caaaggcuauugcguaacuaTT-3' (Integrated DNA Technologies) | KD of RNPS1                                   |
| SAP18 siRNA                                                                 | 5'-gaacugacaagcuuaguaaTT-3' (Integrated DNA Technologies)  | KD of SAP18                                   |
| Primer DNAs for plasmid construction (F: forward primer, R: reverse primer) |                                                            |                                               |
| RBM8A coding-F                                                              | 5'-ACAAGTGGCCTCTGAGGCCCCACCATGGCGGACGTGCTAGATCT-3'         | Construction for final pSB-RBM8A              |
| RBM8A coding-R                                                              | 5'-TGACGGGCCTGACAGGCCTCAGCGACGTCTCCGGTCTG-3'               |                                               |
| Primer DNAs for mRNA products assay (F: forward primer, R: reverse primer)  |                                                            |                                               |
| GAPDH-F                                                                     | 5'-GCACCGTCAAGGCTGAGAAC-3'                                 | PCR for detection of GAPDH cDNA               |
| GAPDH-R                                                                     | 5'-TGGTGAAGACGCCAGTCCA-3'                                  |                                               |
| EIF4A3-F                                                                    | 5'-GATCTTGGCTCCCACAAGAG-3'                                 | PCR for detection of EIF4A3 cDNA              |
| EIF4A3-R                                                                    | 5'-TAGTCACCGAGAGCAAGCAG-3'                                 |                                               |
| TSG101-F                                                                    | 5'-GAAGTTATCATTCCCACAGCTC-3'                               | PCR for detection of spliced TSG101           |
| TSG101-R                                                                    | 5'-GACGTACATGCTTCAGGAAGAC-3'                               |                                               |
| TSG101Δ154-1054-F                                                           | 5'-TACAAATACAGAGACCTAACTCTCCC-3'                           | PCR for detection of re-spliced TSG101        |
| TSG101Δ154-1054-R                                                           | 5'-GACGTACATGCTTCAGGAAGAC-3'                               |                                               |
| RBM8A-F                                                                     | 5'-ATTCATCTCAACCTCGACAGG-3'                                | PCR for detection of RBM8A cDNA               |
| RBM8A-R                                                                     | 5'-CAAATCCTGGCCATTGAGTC-3'                                 |                                               |
| MAGOH-F                                                                     | 5'-CAAAGAGGATGATGCATTGTG-3'                                | PCR for detection of MAGOH cDNA               |
| MAGOH-R                                                                     | 5'-TGTGTTTCATCTCCAATGACGA-3'                               |                                               |
| CASC3-F                                                                     | 5'-ACCACCGCCTCATCTGTATC-3'                                 | PCR for detection of CASC3 cDNA               |
| CASC3-R                                                                     | 5'-TGGGCGGGTTATAGTAGGT-3'                                  |                                               |
| UPF1-F                                                                      | 5'-GCAACGGACGTGGAATACT-3'                                  | PCR for detection of UPF1 cDNA                |
| UPF1-R                                                                      | 5'-CTTGTGCAGGGTCACCTCTT-3'                                 |                                               |
| GAS5-F                                                                      | 5'-CTTGCCTGGACCAGCTTAAT-3'                                 | PCR for detection of GAS5 cDNA                |
| GAS5-R                                                                      | 5'-CAAGCCGACTCTCCATAC-3'                                   |                                               |
| NXF1-F                                                                      | 5'-GATTCTTTGCGAGCCTTACC-3'                                 | PCR for detection of NXF1 cDNA                |
| NXF1-R                                                                      | 5'-AGGAGGAGATGACAGACGACAACC-3'                             |                                               |
| ACINUS-F                                                                    | 5'-GACGATCATCTAGGGTCAGACAG-3'                              | PCR for detection of ACINUS cDNA              |
| ACINUS-R                                                                    | 5'-GGAAGGTGTTTCTTGATCCTCTT-3'                              |                                               |

Left, middle, and right columns: names, sequences, and purpose of the oligonucleotides, respectively.

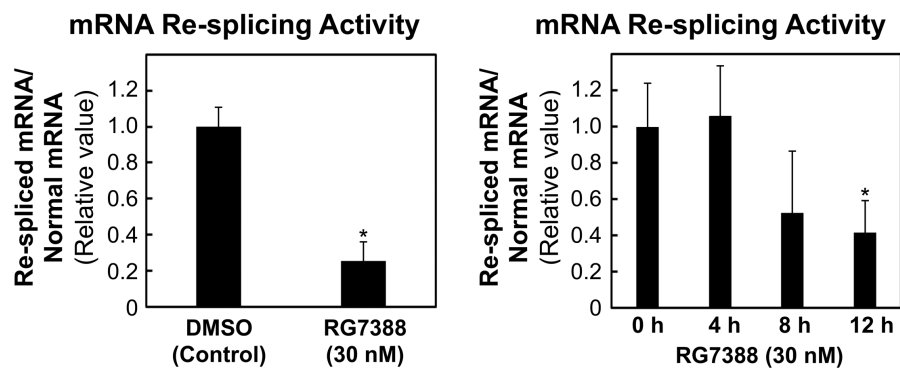

**Figure S1.** Activation of TP53 by the MDM2 inhibitor RG7388 induces the repression of TSG101 mRNA re-splicing activity: To evaluate the re-splicing activity with TSG101 mRNA, the extracted total RNAs from MCF-7 cells were analyzed by RT-qPCR using specific primer sets (see Figure 1a). The RG7388 concentrations and culture time after RG7388 addition were indicated. The histograms represent the means  $\pm$  standard deviations of three replicates (\* $p < 0.05$ ).

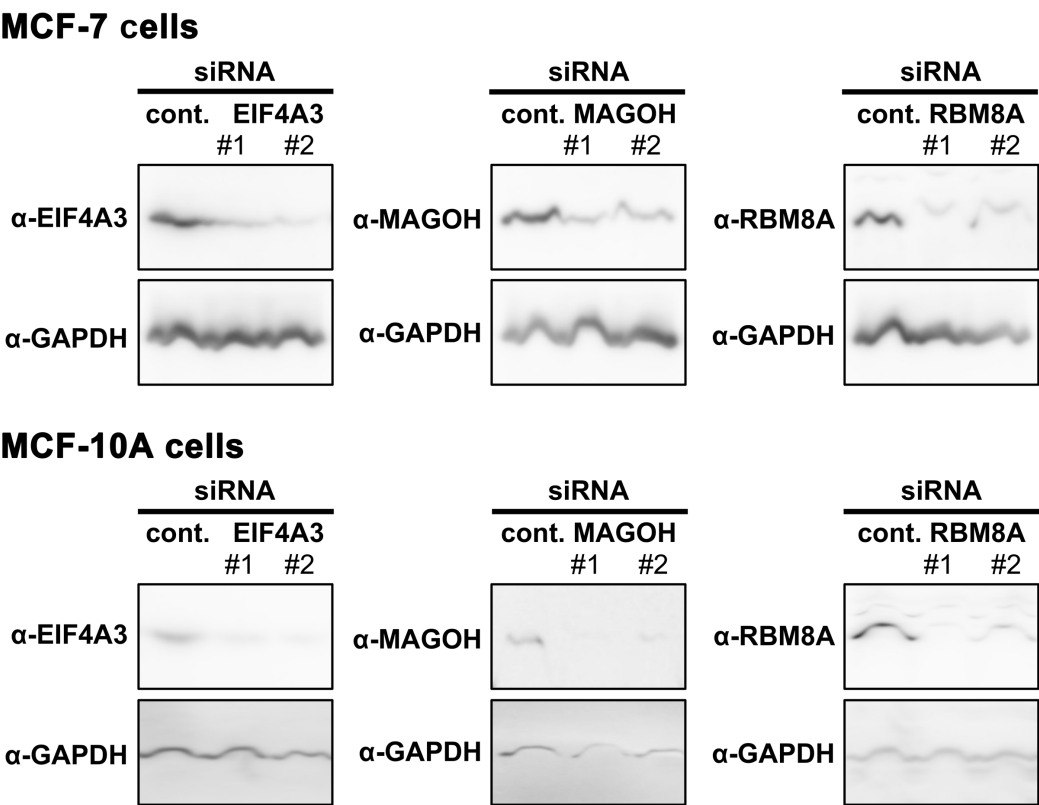

**Figure S2.** The endogenous EJC-core proteins are effectively depleted by the siRNA-mediated knock-down: MCF-7 and MCF-10A cells were transfected with siRNA targeting EIF4A3, RBM8A, MAGOH or control siRNA, and whole cell extracts were analyzed by immunoblotting with the indicated specific antibodies.

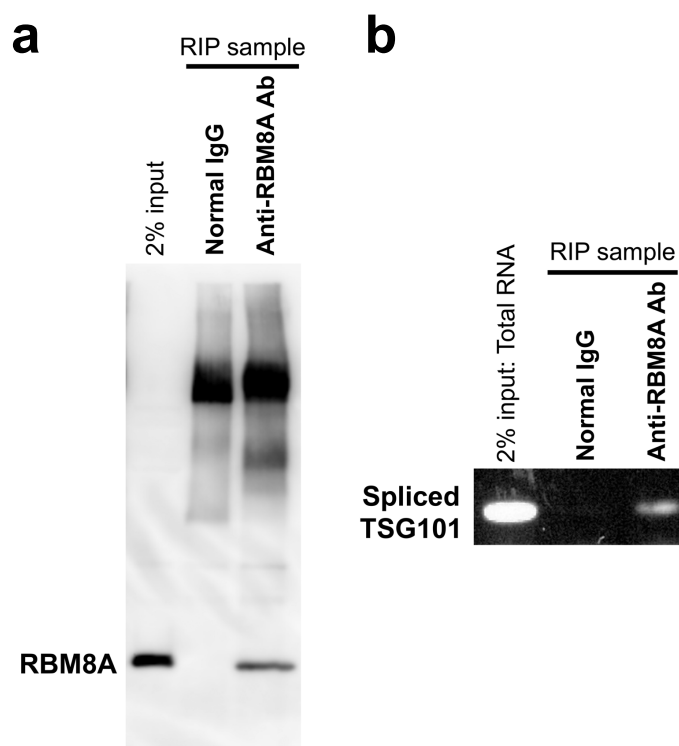

**Figure S3.** The EJC core factor RBM8A binds TSG101 mRNAs in MCF-7 cells: (a) RBM8A-bound mRNAs were separated from cell lysates of MCF-7 cells by RNA immunoprecipitation (RIP). Normal rabbit IgG was used as a negative control of the immunoprecipitation. Two independent RIP assays were performed and a representative immunoblot is shown here. (b) The RIP samples were analyzed by RT-PCR using a primer set targeting spliced TSG101 mRNA. The PCR products were visualized by agarose gel electrophoresis.

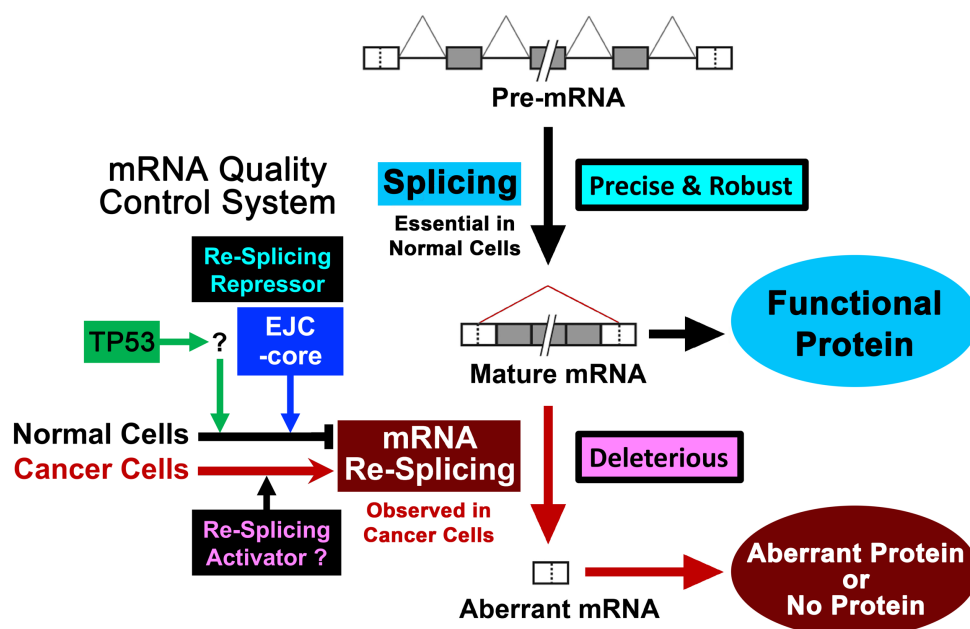

**Figure S4.** Model of the regulation system of cancer-specific mRNA re-splicing: TP53 represses mRNA re-splicing [10,15; see reference list in the main text], however, the downstream repressor has not been identified. Our discovery of EJC-core as a repressor of mRNA re-splicing implies a mechanism for terminating pre-mRNA splicing in normal cells, which is essential to maintain quality of mRNA.

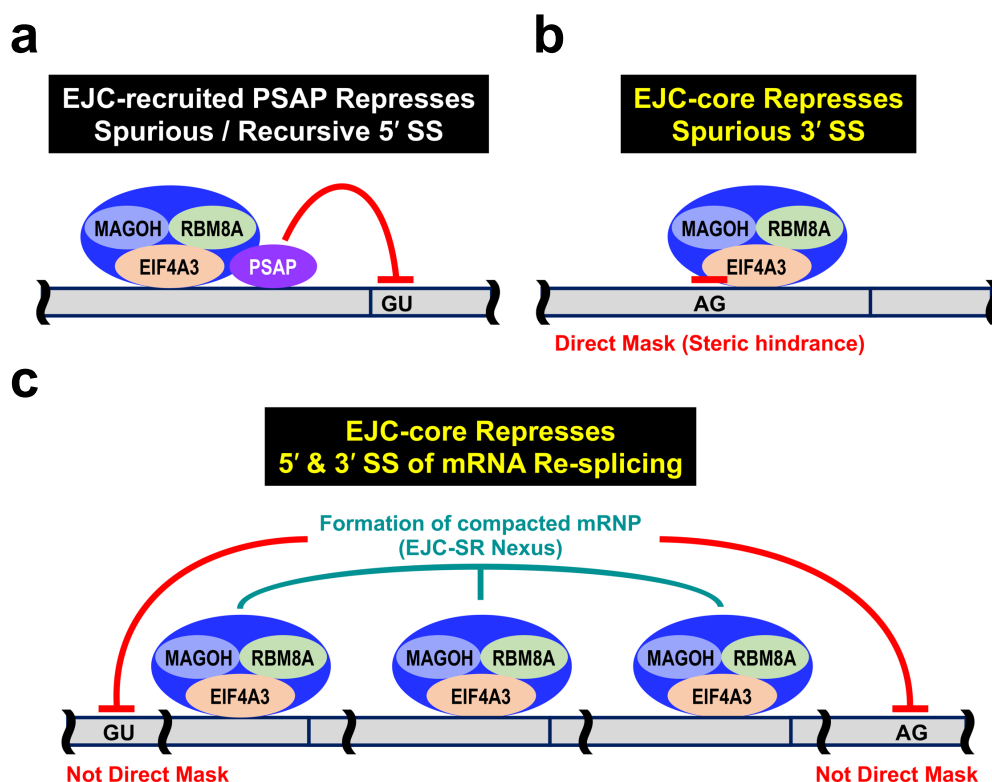

**Figure S5.** Similarity and distinction with other findings of the EJC-induced splicing repression: Recently, it has been reported that EJC deposition on mRNA represses nearby spurious splice sites [22; see reference list in the main text] and downstream recursive 5' splice site [23]. (a) EJC-recruited PSAP complex (PNN, SAP18 and RNPS1) represses spurious 5' splice site (SS) [22] and downstream recursive 5' SS (but the requirement of PSAP is dependent on the substrate of recursive splicing) [23]. (b) On the other hand, nearby spurious 3' SS is repressed by direct binding of the EJC-core, which causes steric hindrance [22]. (c) Here we showed that EJC-core represses exonic 5' SS and 3' SS used in mRNA re-splicing. Previous CLIP-Seq data suggest that the repression of mRNA re-splicing is not due to the direct binding of EJC-core on the 5' SS and 3' SS [24]. We propose that EJC-core deposition triggers the formation of compacted mRNP leading to the prevention of further re-splicing on mRNA (see Figure 6).
